# Supplementary material for: Enhancement of ozonation efficiency employing dead-end hollow fiber membranes
Source: Royal Society of Chemistry journal article supplement (doi:10.1039/d0ew00294a), 2020-01-01
Supplement: d0ew00294a1.pdf [file d0ew00294a1.pdf]

## Enhancement of ozonation efficiency employing dead-end hollow fiber membranes

Efthimia Kaprara<sup>a</sup>, Margaritis Kostoglou<sup>b</sup>, Chrysovalantou Koutsiantzi<sup>a</sup>, Savvina Psaltou<sup>b</sup>, Anastasios I. Zouboulis<sup>b</sup> and Manassis Mitrakas<sup>\*a</sup>

<sup>a</sup>Analytical Chemistry Laboratory, Department of Chemical Engineering, Aristotle University of Thessaloniki, 54124, Thessaloniki, Greece. E-mail: manassis@eng.auth.gr

<sup>b</sup>Laboratory of Chemical and Environmental Technology, School of Chemistry, Aristotle University of Thessaloniki, 54124, Greece.

### Electronic Supplementary Information

#### Experimental setup

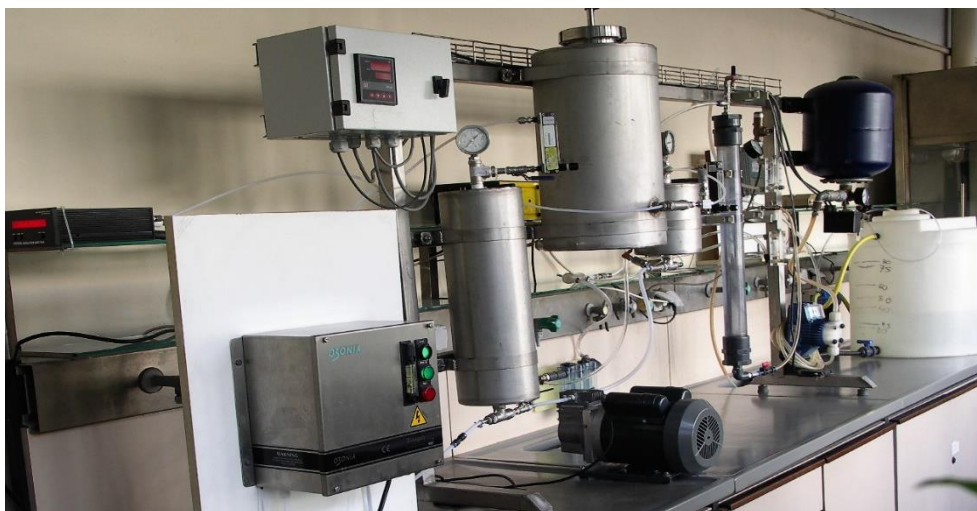

Fig. ES11 Ozonation continuous flow pilot unit.

#### Ozone self-decomposition

##### 1. Kinetics

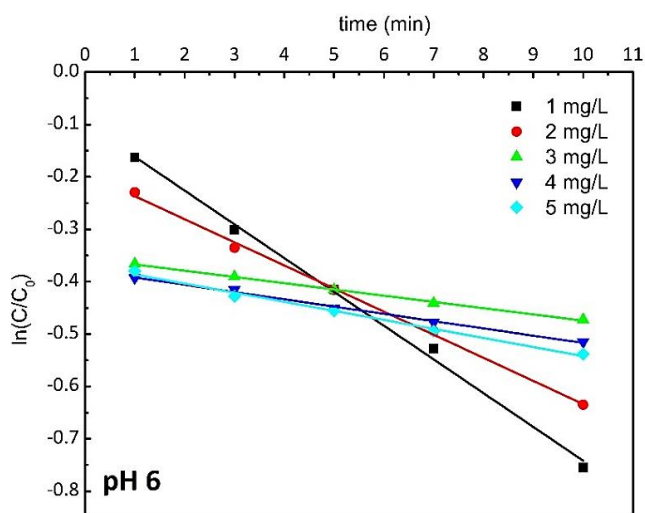

Fig. ES12 Plot of  $\ln(C/C_0)$  versus time for self-decomposition of ozone at pH 6.

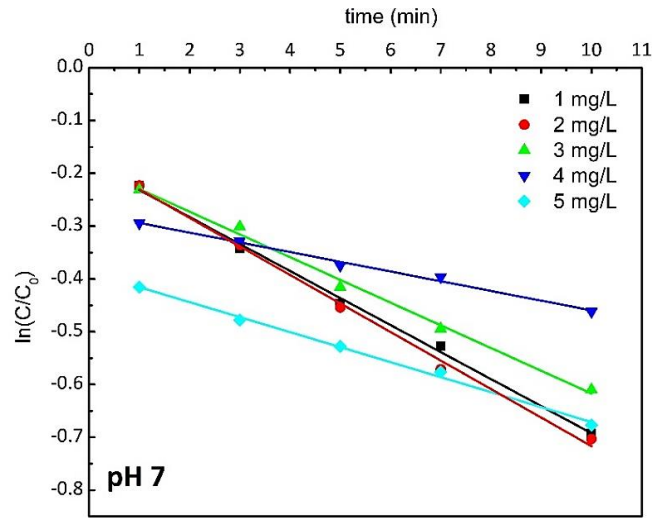

Fig. ES13 Plot of  $\ln(C/C_0)$  versus time for self-decomposition of ozone at pH 7.

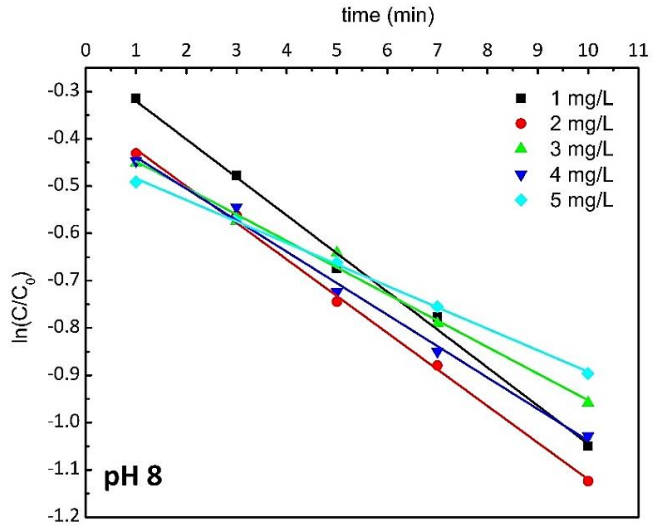

Fig. ES14 Plot of  $\ln(C/C_0)$  versus time for self-decomposition of ozone at pH 8.

## 2. Calculations for ozone self-decomposition after the membrane

The residence time for ozone self-destruction,  $t_d$ , is calculated as the sum of time intervals,  $\Sigma t_i$ , spent in each section of the experimental set up after the mixture is exiting the membrane and just before the dissolved ozone meter. A time interval,  $t_i$  is determined as  $t_i = L_i / (Q_L / E_i)$ , where  $Q_L$  is the liquid flow and  $L_i$ ,  $E_i$  the length and area of each section. Residence time is then corrected with volume fraction,  $\phi$ , as  $t_{d\text{ cor}} = t_d(1 - \phi)$ .

Volume fraction is calculated as analytically shown below.

$$\phi = \frac{Q_{O_2} + Q_{N_2}}{Q_{O_2} + Q_{N_2} + Q_L} \quad (\text{ESI1})$$

$$Q_{N_2} = \%N_2 \cdot Q_{\text{gas}} \quad (\text{ESI2})$$

$$Q_{O_2} = \frac{P_{\text{STP}} \cdot T}{P \cdot T_{\text{STP}}} Q_{O_2\text{ STP}} \quad (\text{ESI3})$$

$$Q_{O_2\text{ STP}} = \frac{V_{\text{STP}} \cdot \dot{m}_{O_2}}{M_r O_2 \cdot 10^3} \quad (\text{ESI4})$$

$$\dot{m}_{O_2} = (C_{O_2, Lt} - C_{in, O_2}) Q_L \quad (\text{ESI5})$$

where:

$Q_{\text{gas}}$  = volumetric flowrate of gas, L/h

$Q_{O_2}$  = volumetric flowrate of oxygen gas, L/h

$Q_{N_2}$  = volumetric flowrate of nitrogen gas, L/h

$\%N_2$  = nitrogen mol fraction

$P_{STP}$  = standard pressure (1 atm)

$T_{STP}$  = standard temperature (273.15 K)

$P$  = pressure (atm)

$T$  = temperature (K)

$V_{STP}$  = volume of a mole of gas at STP (22.4L)

$Q_{O_2, STP}$  = volumetric flowrate of oxygen gas at STP, L/h

$M_{r, O_2}$  = molar mass of  $O_2$

$\dot{m}_{O_2}$  = dissolved oxygen mass flow rate in the membrane, mg/L

$C_{in, O_2}$  = dissolved oxygen concentration in the feed water, mg/L

$C_{O_2, L}$  = dissolved oxygen concentration in liquid outflow from the fiber, mg/L

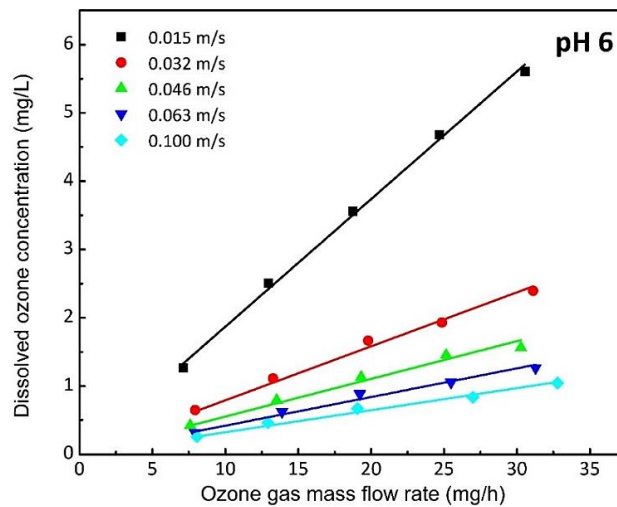

Fig. ESI5 Dissolved ozone concentrations versus ozone gas mass flow rate for different liquid velocities at pH 6 (PDMS membrane).

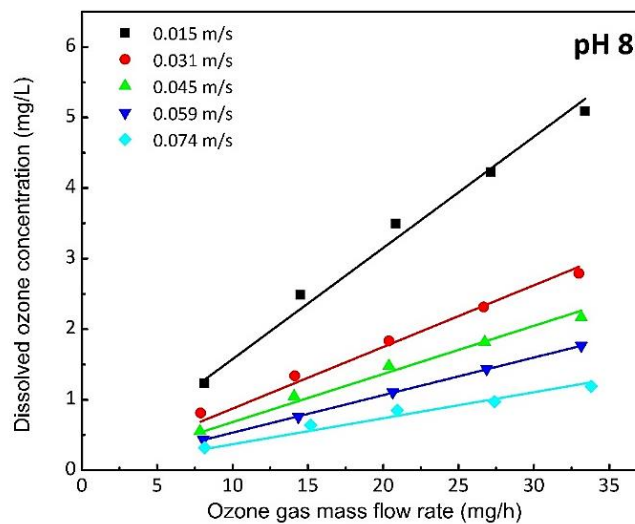

Fig. ESI6 Dissolved ozone concentrations versus ozone gas mass flow rate for different liquid velocities at pH 8 (PDMS membrane).

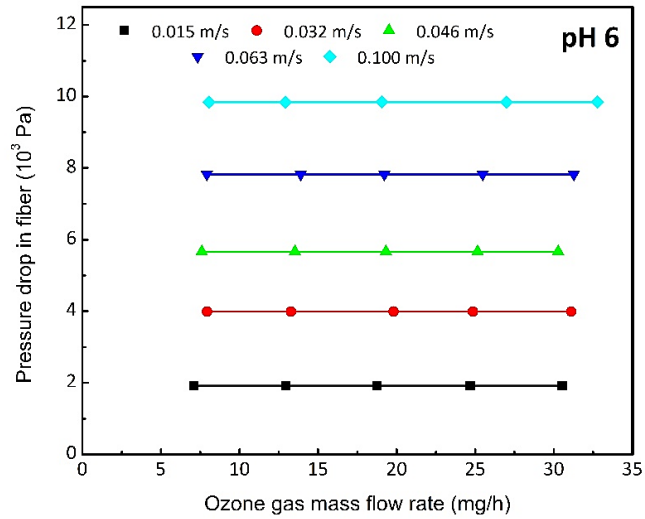

**Fig. ES17** Pressure drop in the fiber versus ozone gas mass flow rate for different liquid velocities at pH 6 (PDMS membrane).

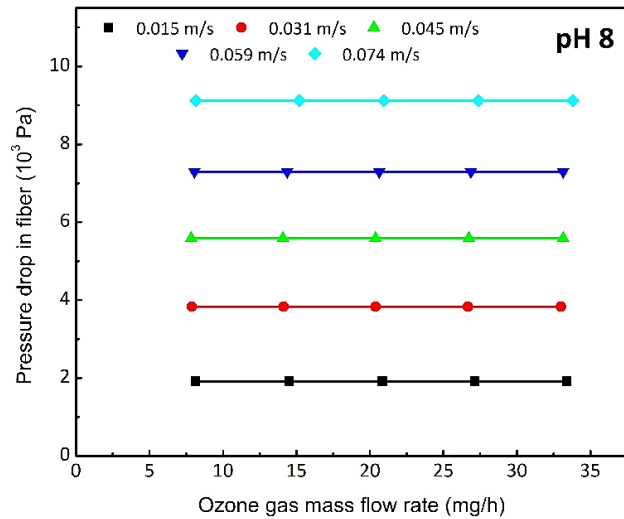

**Fig. ES18** Pressure drop in the fiber versus ozone gas mass flow rate for different liquid velocities at pH 6 (PDMS membrane).

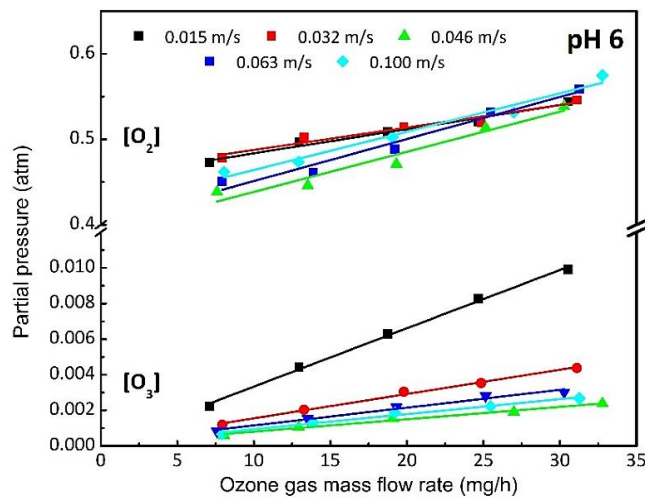

**Fig. ES19** Partial pressures of O<sub>2</sub> and O<sub>3</sub> in the shell side versus ozone gas mass flow rate for different liquid velocities at pH 6 (PDMS membrane).

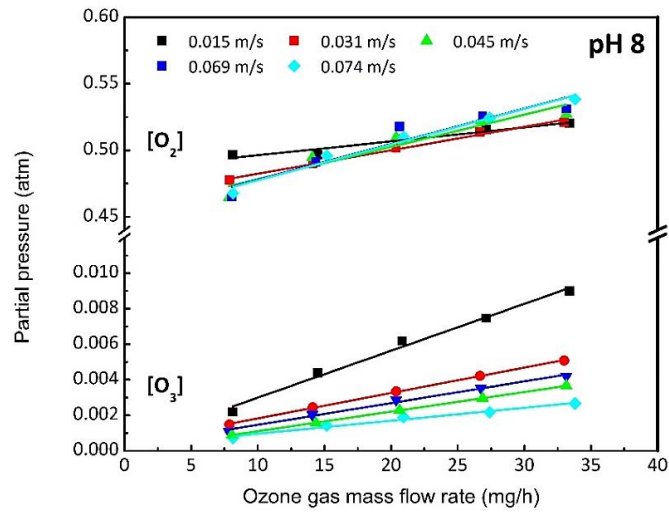

**Fig. ESI10** Partial pressures of O<sub>2</sub> and O<sub>3</sub> in the shell side versus ozone gas mass flow rate for different liquid velocities at pH 8 (PDMS membrane).
